# Supplementary material for: Porphyrin metal–organic frameworks with bilayer and pillar-layered frameworks and third-order nonlinear optical properties
Source: Royal Society of Chemistry journal article supplement (doi:10.1039/d3dt00440f), 2023-01-01
Supplement: d3dt00440f1.pdf [file d3dt00440f1.pdf]

## Supplementary Information

### Porphyrin Metal-Organic Frameworks with Bilayer and Pillar-layered Frameworks for Third-order Nonlinear Optical Properties

Ziyi Zhu<sup>a</sup>, Zirui Wang<sup>a,b</sup>, Qiao-Hong Li<sup>a</sup>, Zhizhou Ma<sup>a</sup>, Fei Wang<sup>a\*</sup>, and Jian Zhang<sup>a\*</sup>

<sup>a</sup> State Key Laboratory of Structural Chemistry, Fujian Institute of Research on the Structure of Matter, the Chinese Academy of Sciences, Fuzhou, Fujian 350002, People's Republic of China.

<sup>b</sup> School of Physical Science and Technology, ShanghaiTech University, Shanghai 201210, China. E-mail: [wangfei04@fjirsm.ac.cn](mailto:wangfei04@fjirsm.ac.cn).

## 1. Experimental Section

The S,S-BED was synthesized according to our former work. All other chemicals were commercially purchased and directly used without further purification. Fourier transform infrared (FT-IR) spectra were recorded with a Spectrum One FT-IR Spectrometer in the 400-4000 cm<sup>-1</sup> range. Thermogravimetric analysis (TGA) data were carried out in an N<sub>2</sub> atmosphere with a heating rate of 10 °C/min on a STA 449F3 integration thermal analyzer. The UV-Vis (UV) absorption spectra data were carried out using Lambda-950 UV-Vis spectrophotometer. Powder X-ray diffraction (PXRD) data were collected on a Rigaku Mini Flex II diffractometer using CuK $\alpha$  radiation ( $\lambda = 1.54056 \text{ \AA}$ ) in the  $2\theta$  range of 5-50° with a scanning rate of 10° min<sup>-1</sup>. The AFM images were recorded with a Bruker Dimension ICON. X-ray photoelectron spectroscopy (XPS) spectra for the samples were recorded by using an ESCALAB250Xi. Transmission electron microscope (TEM) images recorded for the samples were used JEM-2010F.

### 1.1 Synthesis of OH-opd

**Synthesis of OH-opd:** 10.8 g, 0.1 mol of o-phenylenediamine, 8.0 g, 0.054 mol of L-malic acid and 4 mol/L, 100 ml of hydrochloric acid were mixed in a round bottom flask at room temperature and stirred for about 5 minutes, then heated to reflux in an oil bath at 115°C for 9 hours. The reaction was dark green, and after standing overnight,

the green protonated chloride crystalline salt was formed, filtered until drained, and the precipitate was filtered out into a 500 mL round bottom flask with 100 mL of water and 0.3 g of activated carbon (heated to 100°C for complete dissolution), refluxed for two hours, filtered while hot, and the filtrate was removed and adjusted to pH 8-9 with aqueous sodium hydroxide, filtered, washed and dried to obtain the sample (yield: 45%, Calculation based on o-phenylenediamine).<sup>1</sup>

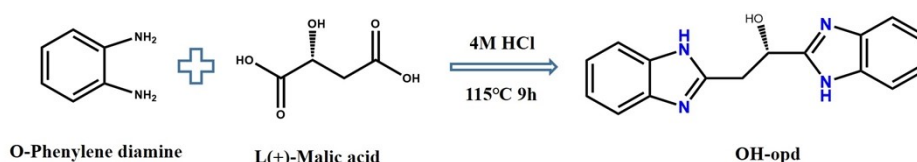

**Scheme S1.** The synthesis of OH-opd ligands

## 1.2 Synthesis of PMOF-1

Zn(NO<sub>3</sub>)<sub>2</sub>·6H<sub>2</sub>O (80.0 mg, 0.42 mmol), S,S-BED (60 mg, 0.2 mmol) and tetracarboxyphenylporphyrin (TCPP, 50.0 mg, 0.063 mmol) dissolved in a mixed solvent of 3 mL DEF, 2 mL 1,4-Dioxane and 2 mL H<sub>2</sub>O were placed in a 20 mL vial. The sample was then heated at 100 °C for 6 days and then cooled to room temperature. After washing with ethanol, red crystals were obtained (yield about 34.0 % based on TCPP).

## 1.3 Synthesis of PMOF-2

Zn(NO<sub>3</sub>)<sub>2</sub>·6H<sub>2</sub>O (80.0 mg, 0.42 mmol), S,S-BED (60 mg, 0.2 mmol) and tetracarboxyphenylporphyrin (TCPP, 50.0 mg, 0.063 mmol) dissolved in a mixed solvent of 3 mL DMF, 2 mL 1,4-Dioxane and 2 mL H<sub>2</sub>O were placed in a 20 mL vial. The sample was then heated at 100 °C for 5 days and then cooled to room temperature. After washing with Stock solution, red crystals were obtained (yield about 31.0 % based on TCPP).

## 1.4 Prepare of MOFs dispersed PDMS

PDMS glass were fabricated using Sylgard 184 (Dow Corning) by thoroughly mixing 10 parts base to part curing agent. The MOFs crystals were stripped into MOFs nanoblock and were mixed with the PDMS solution to form MOFs dispersed PDMS suspension. And then, the mixture suspension was added into a template and then put

the template into a vacuum oven at 60 °C for 5 hours. Last, the transparent and flexible MOFs/PDMS glasses were obtained.<sup>2</sup>

### 1.5 Z-scan measurements

The nonlinear optical properties of the PMOFs were evaluated using the Z-scan technique. The excitation light source was an Nd:YAG laser with a repetition rate of 5 Hz. The laser pulses (period, 5 ns; wavelength, 532 nm) were split into two beams with a mirror. The pulse energies at the front and back of the samples were monitored using energy detectors 1 and 2. All of the measurements were conducted at room temperature. The sample was mounted on a computer-controlled translation stage that shifted each sample along the Z-axis.

### 1.6 Calculation of the nonlinear optical parameters

The imaginary parts of the third-order susceptibility ( $Im \chi^{(3)}$ ) and the real parts of third-order susceptibility ( $Re \chi^{(3)}$ ) were determined through relations:

$$Im\chi^{(3)}(esu) = \frac{c^2 n_0^2 \beta \left(\frac{m}{W}\right)}{240\pi^2 \omega}$$

$$Re\chi^{(3)}(esu) = \frac{cn_0^2 n_2 \left(\frac{m^2}{W}\right)}{120\pi^2}$$

Where  $\omega$  is angular frequency of the incident wavelength,  $\beta$  is the nonlinear absorption coefficient,  $n_2$  is the nonlinear refractive index parameter,  $c$  is the speed of light in vacuum,  $\lambda$  is the wavelength of the laser pulse and  $n_0$  is the linear refractive index, respectively.

The absolute value of the third-order NLO susceptibility ( $\chi^{(3)}$ ) of the ZnTCPP were determined according to the following relations:

$$|\chi^{(3)}| = \sqrt{|Im\chi^{(3)}|^2 + |Re\chi^{(3)}|^2}$$

The relationship of the sample transmission and input laser intensity for a spatially Gaussian beam could be plotted from the open-aperture Z-scan curve. From the input

laser pulse energy  $E_{in}$  and beam radius  $\omega(z)$ , the light fluence  $F_{in}(z)$  at any position could be obtained.  $F_{in}(z)$  was defined as:

$$F_{in}(z) = \frac{4E_{in}\sqrt{\ln 2}}{3\pi^2\omega(z)^2}$$

Where  $\omega(z)$  was defined as:

$$\omega(Z) = \frac{\omega_0}{\left[1 + \left(\frac{Z}{z_0}\right)^2\right]^{-0.5}}$$

where  $\omega_0$  and  $z_0$  are the light beam radius and the Rayleigh range, respectively, and  $z_0$  was defined as:

$$z_0 = \frac{k\omega_0^2}{2}$$

Where  $k$  was defined as:

$$k = \frac{2\pi}{\lambda}$$

The curve of output fluence versus input fluence in Figure 4(b) was plotted from Figure 4(c).

The equation fits for the nonlinear adsorption coefficient  $\beta$  as follows:

$$T(Z, S = 1) = \frac{1}{\pi^2(Z, 0)} \int_{-\infty}^{\infty} \ln[1 + q_0(Z, 0)e^{-r^2}] dr$$

$$q_0(Z, 0) = \beta I_0 L_{eff}$$

$$L_{eff} = \frac{1 - e^{-\alpha l}}{\alpha}$$

In these equations,  $I_0$  is the on-axis peak intensity at the focus ( $Z = 0$ ),  $L_{eff}$  is the effective thickness of the sample,  $\alpha$  is the linear absorption coefficient, and  $l$  is the sample thickness.

## 1.7 Photocurrent measurement

We prepared the working electrode by solution coating method as follows: the newly prepared sample (5 mg) and Nafion (10  $\mu\text{L}$ ) dissolved in 0.5 mL ethanol with ultrasound and 40  $\mu\text{L}$  solution was uniformly dropped on clean FTO conductive glass ( $1.0 \times 4.0 \text{ cm}^2$ ,  $10 \Omega \cdot \text{cm}^{-2}$ ). The photocurrent experiment was carried out on the CHI760E electrochemical workstation of the three electrode system, in which Pt sheet was the counter electrode and Ag/AgCl electrode was the reference electrode. The experiment was carried out in 0.2 M  $\text{Na}_2\text{SO}_4$  electrolyte at room temperature, and a 300 W high-pressure xenon lamp (full band) was used as a visible light source.

## 2. Single crystal synthesis and characterization of compound

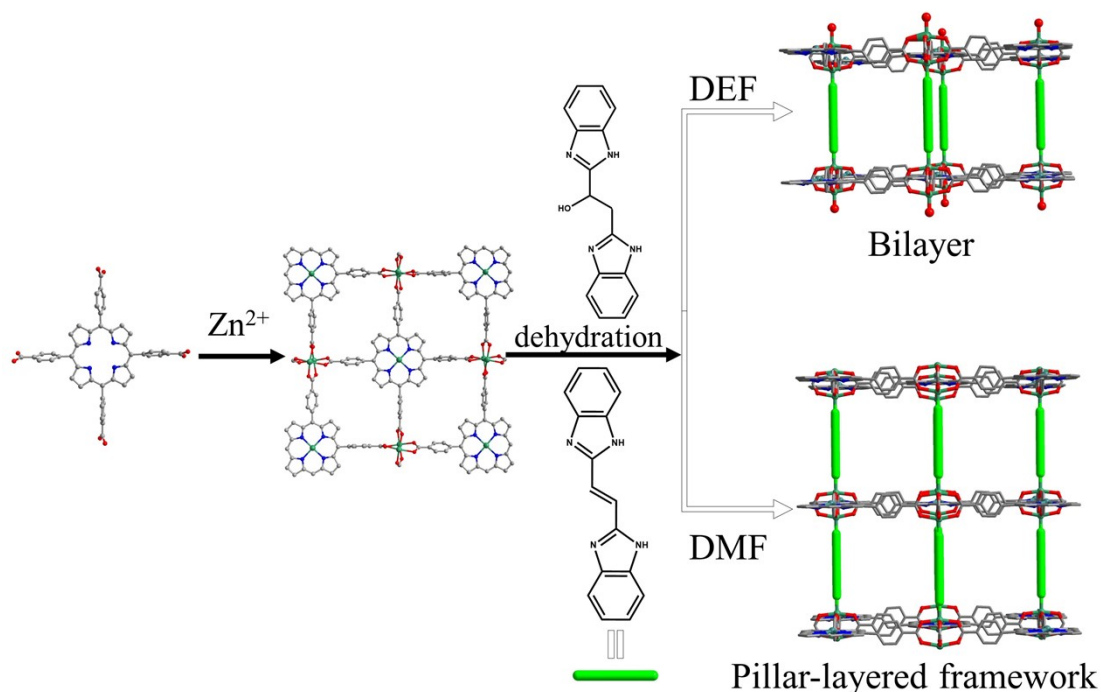

**Scheme S2.** Illustration of the synthesis for **PMOF-1** and **PMOF-2**.

**Table S1.** Crystallographic data and structure refinement for **PMOF-1** and **PMOF-2**.

| Identification code                           | PMOF-1                                                                         | PMOF-1                                                                        |
|-----------------------------------------------|--------------------------------------------------------------------------------|-------------------------------------------------------------------------------|
| Empirical formula                             | C <sub>64</sub> H <sub>48</sub> N <sub>6</sub> O <sub>13</sub> Zn <sub>3</sub> | C <sub>64</sub> H <sub>34</sub> N <sub>8</sub> O <sub>8</sub> Zn <sub>3</sub> |
| Formula weight                                | 1304.18                                                                        | 1239.1                                                                        |
| Temperature/K                                 | 100.0(13)                                                                      | 100.0(13)                                                                     |
| Crystal system                                | triclinic                                                                      | monoclinic                                                                    |
| Space group                                   | <i>P</i> -1                                                                    | <i>C</i> 2/ <i>c</i>                                                          |
| <i>a</i> /Å                                   | 16.6123(5)                                                                     | 23.5128(4)                                                                    |
| <i>b</i> /Å                                   | 16.6936(6)                                                                     | 23.5272(3)                                                                    |
| <i>c</i> /Å                                   | 16.7212(6)                                                                     | 18.2894(3)                                                                    |
| $\alpha$ /°                                   | 118.127(4)                                                                     | 90                                                                            |
| $\beta$ /°                                    | 90.188(3)                                                                      | 96.728(2)                                                                     |
| $\gamma$ /°                                   | 108.145(3)                                                                     | 90                                                                            |
| Volume/Å <sup>3</sup>                         | 3823.3(3)                                                                      | 10047.8(3)                                                                    |
| <i>Z</i>                                      | 2                                                                              | 4                                                                             |
| $\rho_{\text{calc}}$ /cm <sup>3</sup>         | 1.133                                                                          | 0.819                                                                         |
| $\mu$ /mm <sup>-1</sup>                       | 1.551                                                                          | 0.743                                                                         |
| F(000)                                        | 1334                                                                           | 2512                                                                          |
| Crystal size/mm <sup>3</sup>                  | 0.1 × 0.1 × 0.1                                                                | 0.1 × 0.1 × 0.1                                                               |
| Goodness-of-fit on F <sup>2</sup>             | 1.051                                                                          | 1.055                                                                         |
| Final R indexes [ <i>I</i> ≥ 2σ ( <i>I</i> )] | R <sub>1</sub> = 0.0555, wR <sub>2</sub> = 0.1612                              | R <sub>1</sub> = 0.0815, wR <sub>2</sub> = 0.2274                             |
| Final R indexes [all data]                    | R <sub>1</sub> = 0.0639, wR <sub>2</sub> = 0.1677                              | R <sub>1</sub> = 0.0872, wR <sub>2</sub> = 0.2327                             |
| CCDC                                          | 2235076                                                                        | 2235077                                                                       |

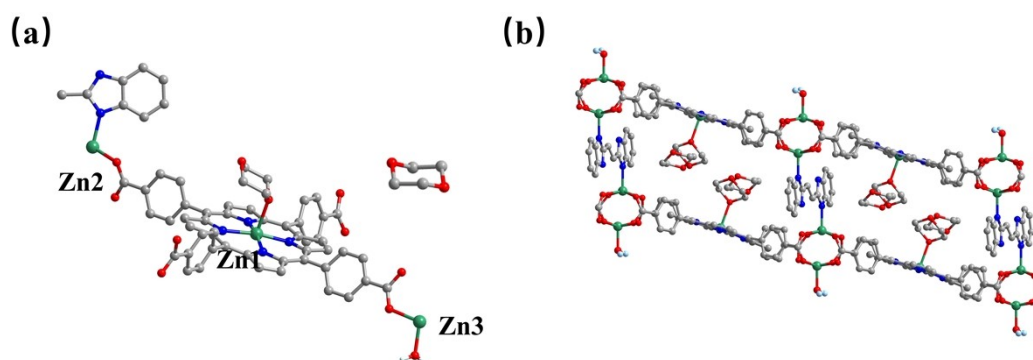**Figure S1.** (a) the asymmetric unit of PMOF-1; (b) view of the 2D bilayer of PMOF-1 containing coordinated 1,4-Dioxane and guest 1,4-Dioxane.

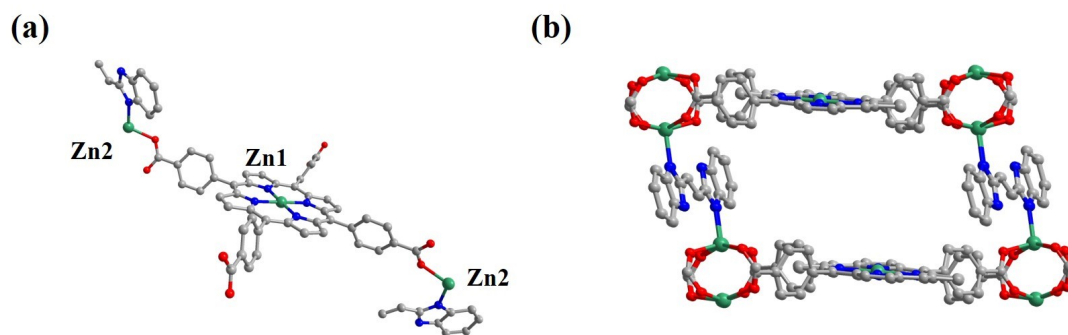

**Figure S2.** (a) the asymmetric unit of PMOF-2; (b) Pore size of PMOF-2.

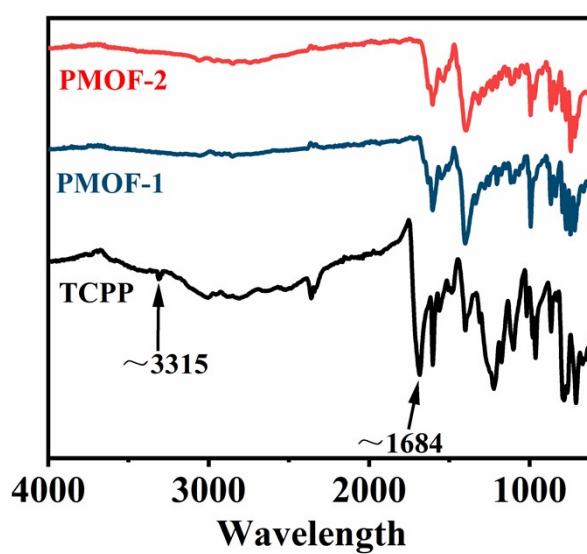

**Figure S3.** The IR spectra of PMOF-1, PMOF-2 and TCPP.

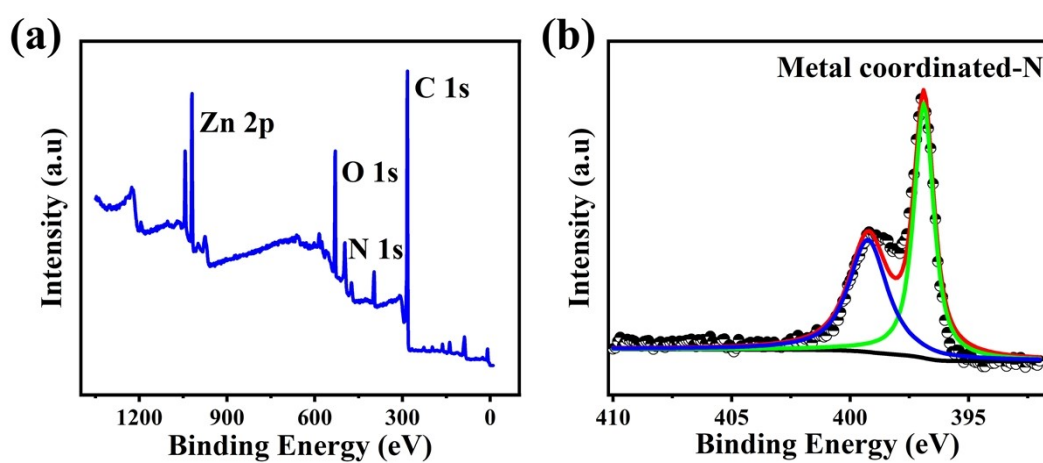

**Figure S4.** (a) The survey XPS and (b) N 1s XPS spectra of PMOF-1.

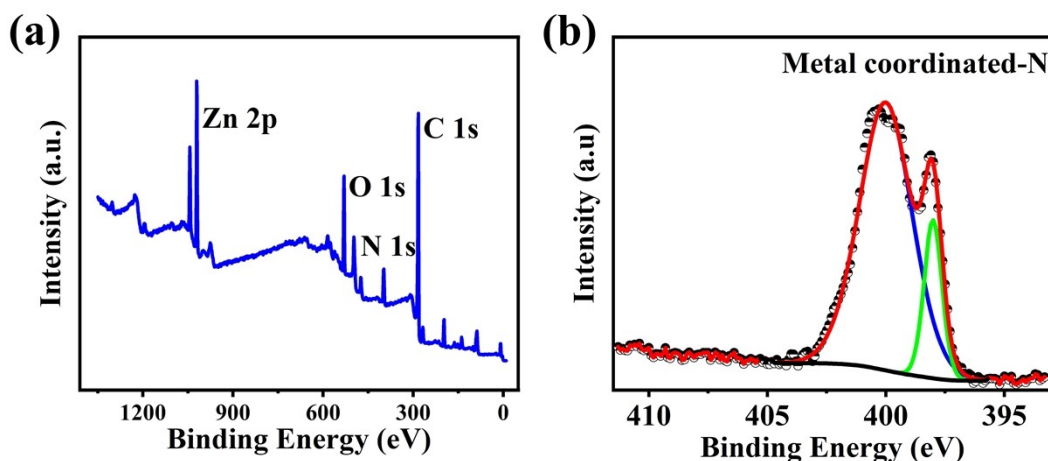

Figure S5. (a) The survey XPS and (b) N 1s XPS spectra of PMOF-2.

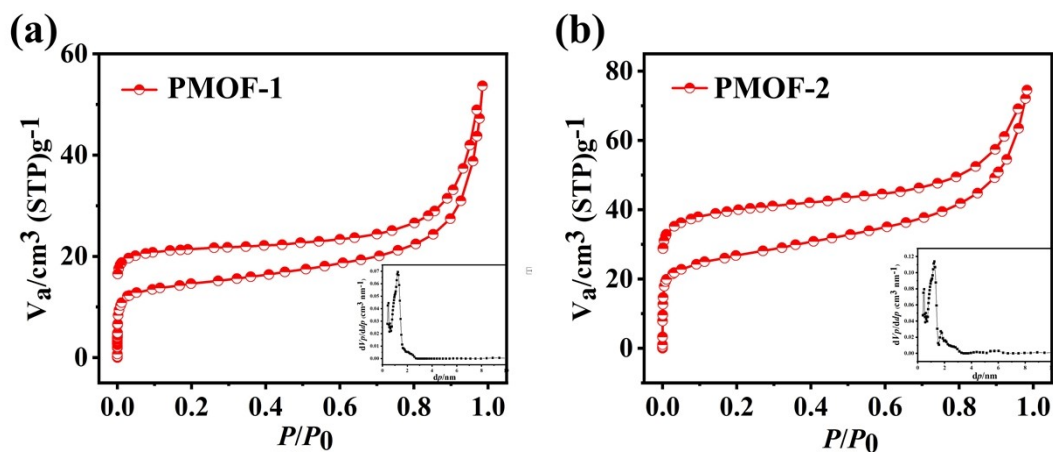

Figure S6. The Adsorption of PMOF-1, PMOF-2.

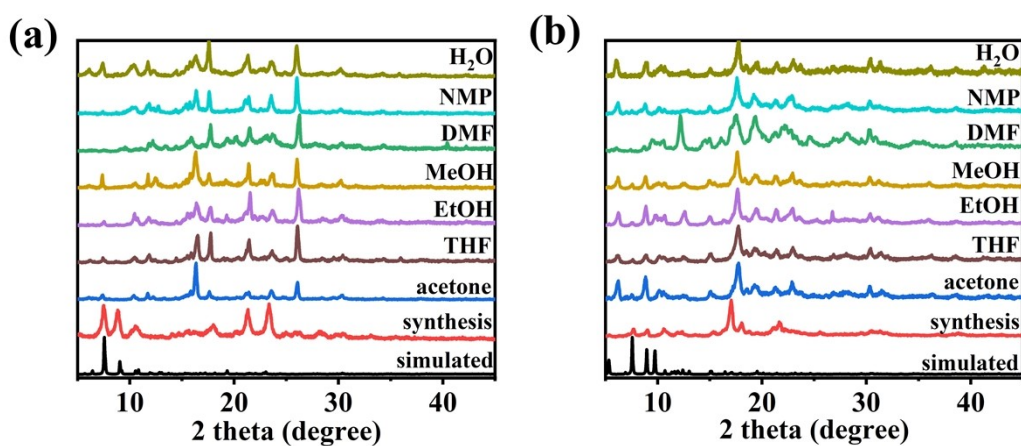

Figure S7. The stability of PMOF-1 (a) and PMOF-2 (b) in different solvents at room temperature.



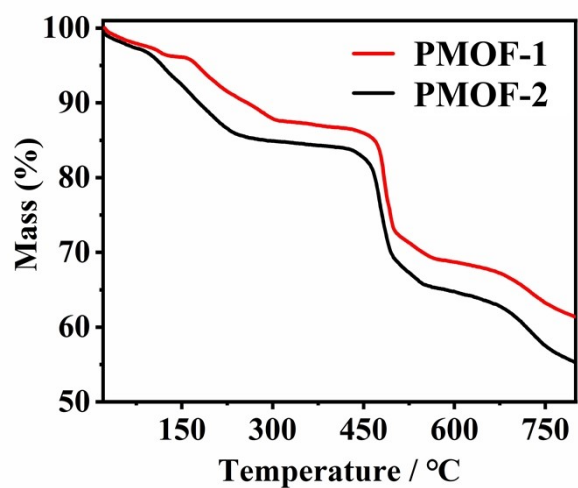

Figure S8. The TG of PMOF-1, PMOF-2.

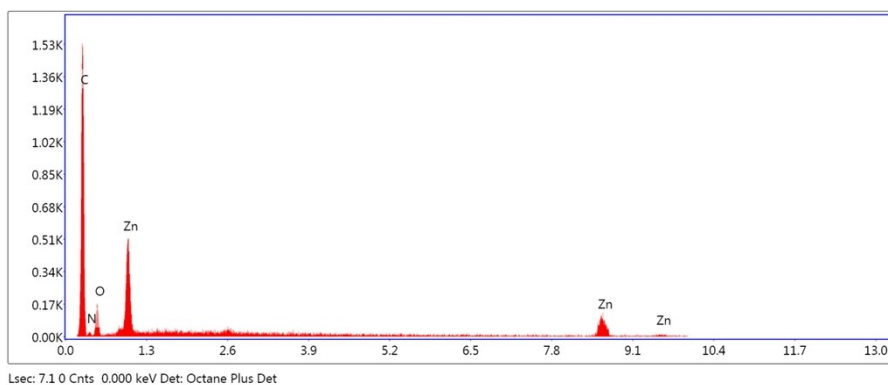

Figure S9. The SEM EDS of PMOF-1.

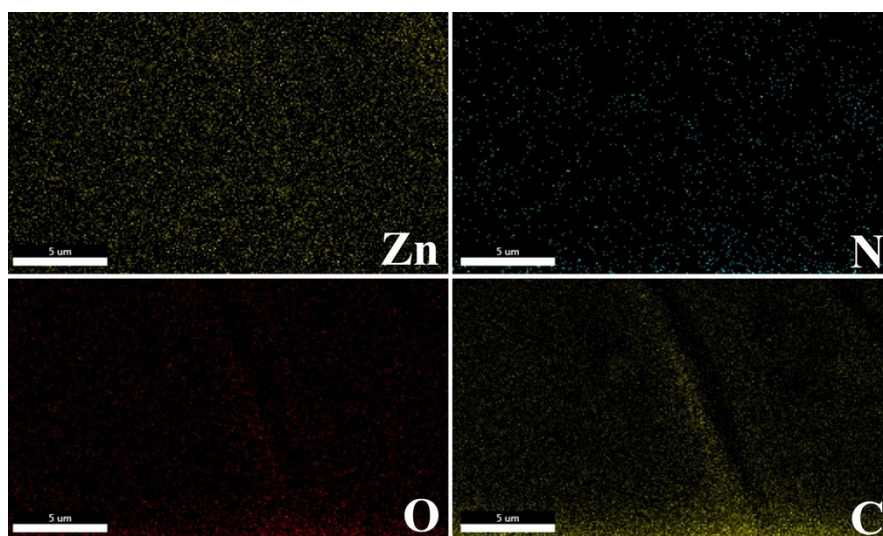

Figure S10. The SEM elemental mapping of PMOF-1.

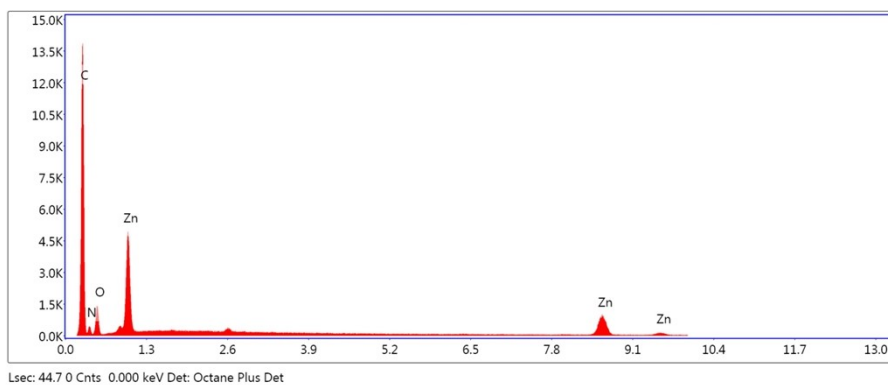

**Figure S11.** The SEM EDS of PMOF-2.

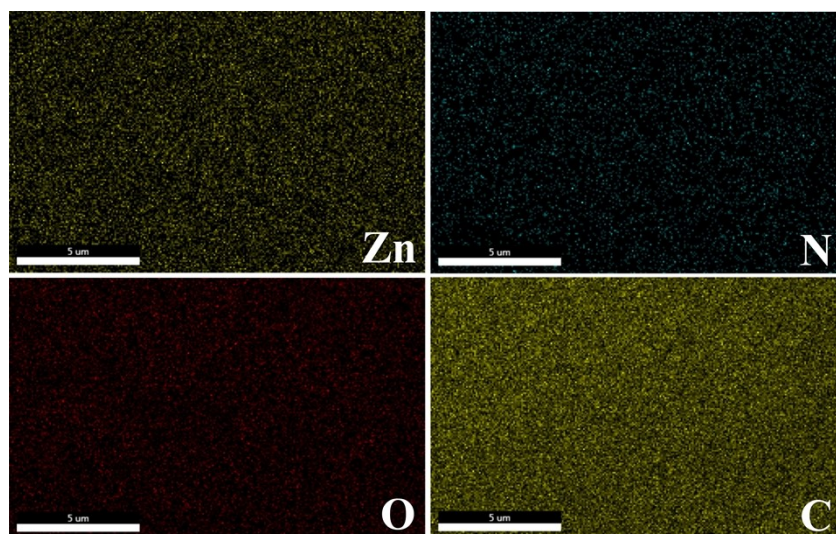

**Figure S12.** The SEM elemental mapping of PMOF-2.

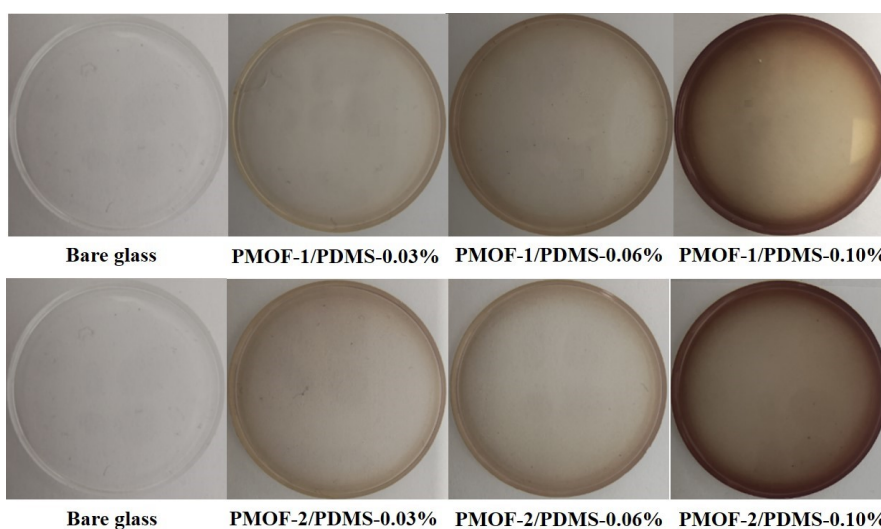

**Figure S13.** The photograph of PMOF-1/PDMS and PMOF-2/PDMS with different concentrations.

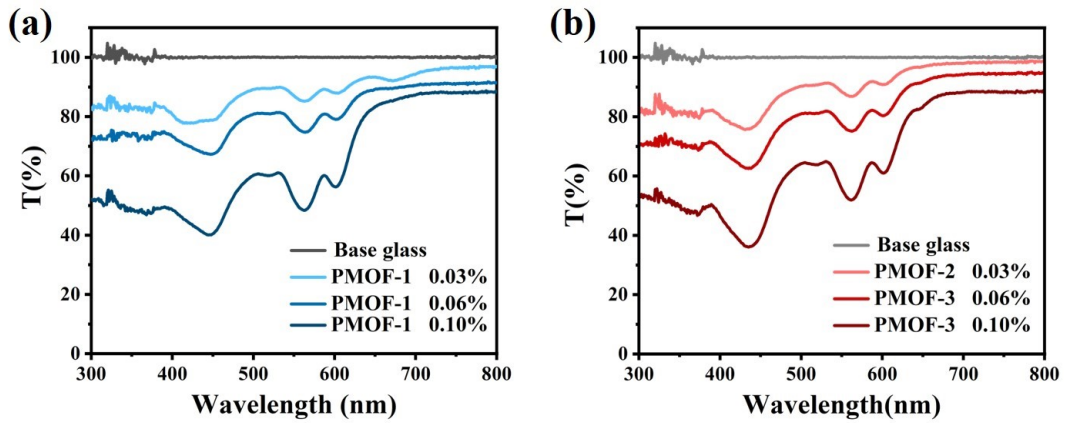

**Figure S14.** The linear transmittances of **PMOF-1/PDMS** and **PMOF-2/PDMS** with different concentrations.

### 3. Third order nonlinear optical measurement

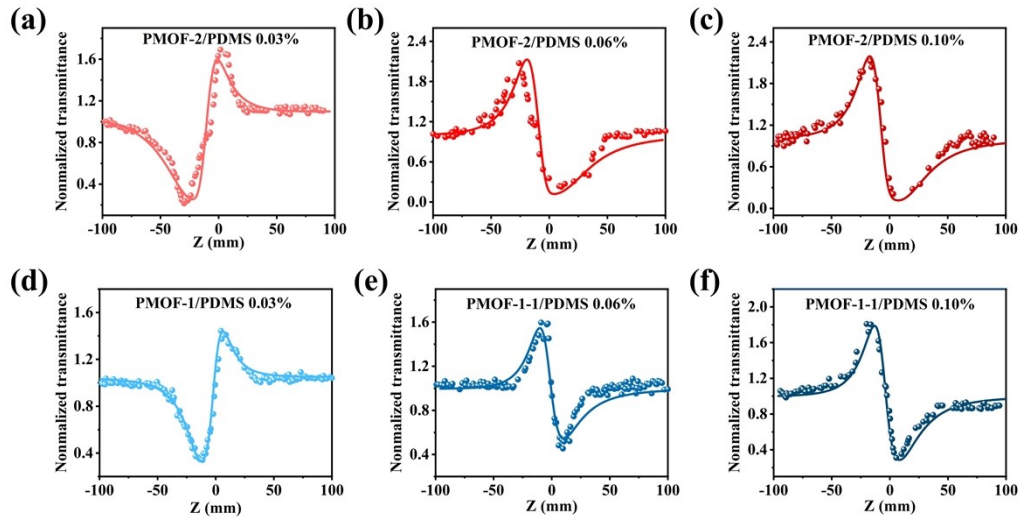

**Figure S15.** Nonlinear refractive response of **PMOF/PDMS** showed a clear peak-to-trough trend, indicating their self-defocusing behavior.

**Table S2.** The comparison of the nonlinear absorption coefficients.

| Samples              | Nonlinear absorption coefficient (cm/GW) | References       |
|----------------------|------------------------------------------|------------------|
| <b>PMOF-2/PDMS</b>   | <b>1165</b>                              | <b>This work</b> |
| <b>PMOF-1/PDMS</b>   | <b>625</b>                               | <b>This work</b> |
| ZnTPyP-1(Zn/Cu)/PDMS | 4650                                     | 2                |
| Por-COF-ZnCu         | 4470                                     | 3                |

|                                                                                  |        |    |
|----------------------------------------------------------------------------------|--------|----|
| Por-COF-ZnNi                                                                     | 4170   |    |
| Por-COF-HH                                                                       | 1170   |    |
| Por-TzTz-POF                                                                     | 1100   | 4  |
| MQD-TPP/PMMA film                                                                | 1059.2 | 5  |
| Pure grapheme                                                                    | 900    | 6  |
| Zinc porphyrin                                                                   | 366    |    |
| Copper porphyrin                                                                 | 132    |    |
| [(TBA) <sub>8</sub> {(4-TPP-Mn)(Mo <sub>6</sub> O <sub>18</sub> ) <sub>4</sub> } | 98     | 7  |
| Si(OH) <sub>2</sub> TPPc                                                         | 136    | 8  |
| DNDs-Si(OH) <sub>2</sub> TPPc                                                    | 125    |    |
| DNDs-ZnTPPc                                                                      | 60.9   |    |
| DNDs-H <sub>2</sub> TPPc                                                         | 58.5   |    |
| ZnTPPc                                                                           | 42.8   |    |
| H <sub>2</sub> TPPc                                                              | 41     |    |
| P <sub>2</sub> Pt                                                                | 45     | 9  |
| P <sub>1</sub> Pt                                                                | 39     |    |
| 1-GO                                                                             | 93     | 10 |
| GO                                                                               | 2.6    |    |
| PIZA-1                                                                           | 28     | 11 |
| C <sub>60</sub> @PIZA-1                                                          | 19     |    |
| HKUST-1-200                                                                      | 1.6    | 12 |

**Table S3.** Linear and NLO data of **PMOF-1/PDMS** with different concentrations.

| Samples | Tmin | $\beta$ ( $\times 10^{-9}$ m/W) | Im $\chi^{(3)}$ ( $\times 10^{-11}$ esu) | F <sub>OL</sub> (J cm <sup>-1</sup> ) |
|---------|------|---------------------------------|------------------------------------------|---------------------------------------|
| 0.03%   | 0.92 | 3.60                            | 7.35                                     | 1.74                                  |
| 0.06%   | 0.84 | 5.05                            | 11.6                                     | 0.97                                  |
| 0.10%   | 0.50 | 6.25                            | 12.3                                     | 0.60                                  |

**Note:** Tmin: Transmissivity;  $\beta$ : nonlinear coefficient; Im  $\chi^{(3)}$ : the imaginary parts of the third-order susceptibility; F<sub>OL</sub>: limiting threshold.

**Table S4.** Linear and NLO data of PMOF-2/PDMS with different concentrations.

| Samples | Tmin | $\beta$ ( $\times 10^{-9}$ m/W) | Im $\chi^{(3)}$ ( $\times 10^{-11}$ esu) | F <sub>OL</sub> (J cm <sup>-1</sup> ) |
|---------|------|---------------------------------|------------------------------------------|---------------------------------------|
| 0.03%   | 0.87 | 5.45                            | 11.4                                     | 1.40                                  |
| 0.06%   | 0.74 | 9.25                            | 20.3                                     | 0.54                                  |
| 0.10%   | 0.43 | 11.65                           | 24.1                                     | 0.24                                  |

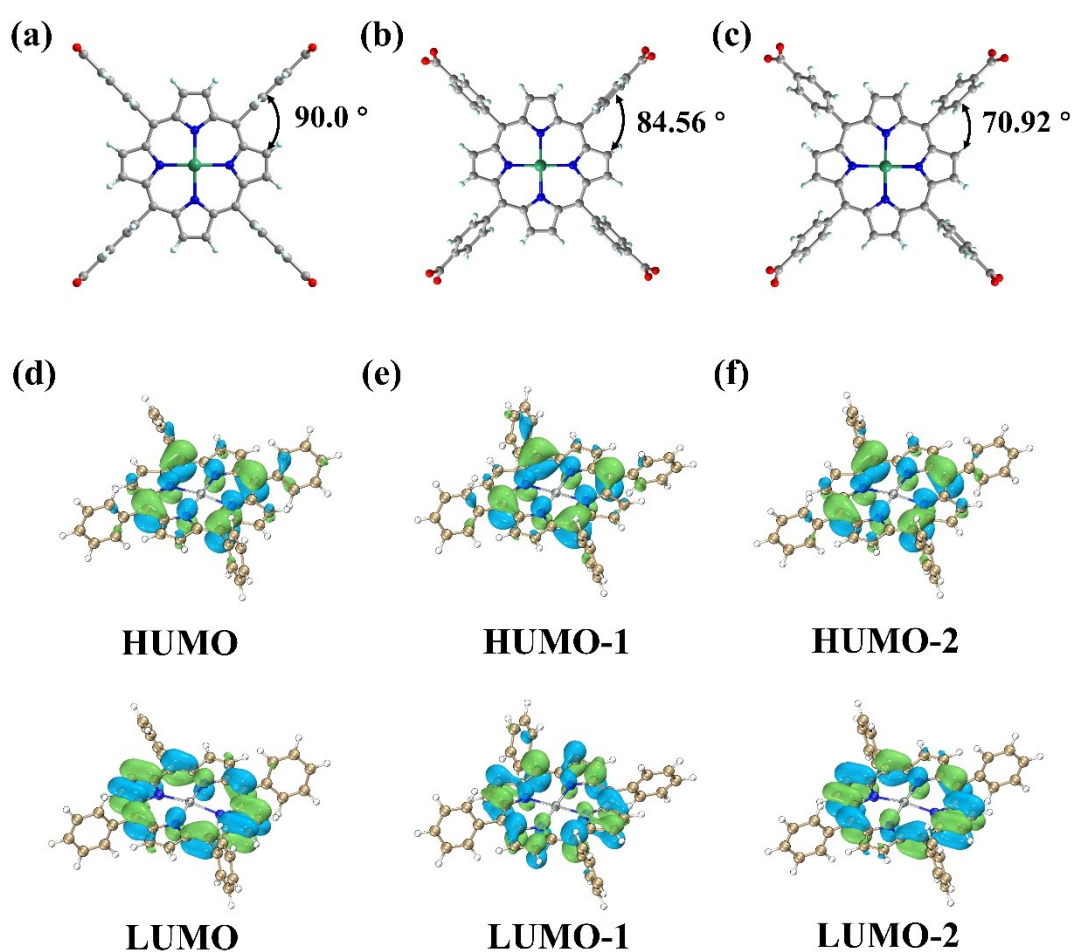

**Figure S16.** The frontier molecular orbitals diagram of HOMO and LUMO for PMOF-1 and PMOF-2 are compared with Zn-TCPP 2D.

To gain further insight into NLO performance of dimension in PMOFs, the theoretical calculation based on DFT was performed, and the noninterpenetrated Part A and Part B For the PMOF structures. when the angle between porphyrin ring and benzene is 70.92°, it is more stable than 84.56° ( $\Delta E=0.078$  eV), and 90° ( $\Delta E=0.470$

eV). The highest occupied molecular orbital (HOMO) and lowest unoccupied molecular orbital (LUMO) are mainly distributed on the porphyrin ring, and the HOMO-LUMO gap of PMOF-2 (70.92°) is 0.0044 eV and 0.0255 eV smaller than that of PMOF-1 (84.56°) and Zn-TCPP (90°), respectively. From the perspective of charge transfer, the three ZnTCPP structures are mainly electron redistribution within the porphyrin ring (Zn-TCPP (90°): 94.18%, PMOF-1 (84.56°): 93.73%, PMOF-2 (70.92°): 93.53%), but with the decrease of angle, the charge transfer amount between porphyrin and benzene ring increases (Zn-TCPP (90°): 5.73%, PMOF-1 (84.56°): 6.17%, PMOF-2 (70.92°): 6.37%), this makes PMOF-2 have more excellent third-order performance.

## Reference

1. Z.-W. Wang, Z.-Y. Zhu, S. Li and F. Wang, *CrystEngComm*, 2022, **24**, 3465-3468.
2. D. J. Li, Q. H. Li, Z. R. Wang, Z. Z. Ma, Z. G. Gu and J. Zhang, *J Am Chem Soc*, 2021, **143**, 17162-17169.
3. B. P. Biswal, S. Valligatla, M. Wang, T. Banerjee, N. A. Saad, B. M. K. Mariserla, N. Chandrasekhar, D. Becker, M. Addicoat, I. Senkovska, R. Berger, D. N. Rao, S. Kaskel and X. Feng, *Angew Chem Int Ed Engl*, 2019, **58**, 6896-6900.
4. M. Samal, S. Valligatla, N. A. Saad, M. V. Rao, D. N. Rao, R. Sahu and B. P. Biswal, *Chem Commun (Camb)*, 2019, **55**, 11025-11028.
5. P. Jiang, B. Zhang, Z. Liu and Y. Chen, *Nanoscale*, 2019, **11**, 20449-20455.
6. N. Jia, C. He, S. Wang, W. Song, Z. Chen, Y. Zu, Y. Gao and Y. Dong, *Optical Materials*, 2018, **76**, 81-89.
7. S. u. Hassan, F. Nawaz, Z. U. Haq Khan, A. Firdous, M. A. Farid and M. S. Nazir, *Optical Materials*, 2018, **86**, 106-112.
8. R. Matshitse, S. Khene and T. Nyokong, *Diamond and Related Materials*, 2019, **94**, 218-232.
9. Z. Liu, J. Sun, C. Yan, Z. Xie, G. Zhang, X. Shao, D. Zhang and S. Zhou, *Journal of Materials Chemistry C*, 2020, **8**, 12993-13000.
10. K. Garg, R. Shanmugam and P. C. Ramamurthy, *Carbon*, 2017, **122**, 307-318.
11. D. J. Li, Z. G. Gu and J. Zhang, *Chem Sci*, 2020, **11**, 1935-1942.
12. Z. G. Gu, D. J. Li, C. Zheng, Y. Kang, C. Woll and J. Zhang, *Angew Chem Int Ed Engl*, 2017, **56**, 6853-6858.
